# Supplementary material for: Immune tolerance against infused FVIII in hemophilia A is mediated by PD-L1+ Tregs
Source: JCI journal article supplement (doi:10.1172/jci159925), 2022-09-15
Supplement: sd1 [file 1]

1 **Supplemental material**

2 **Supplemental Figures**

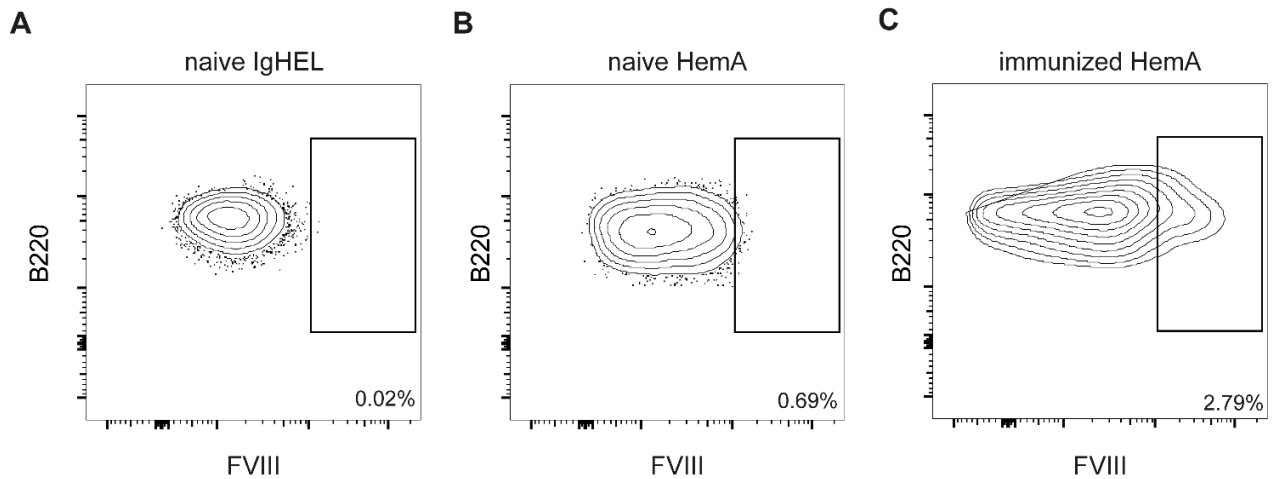

3  
4  
5 **Supplemental Figure 1. FVIII staining specificity.** Representative blots of FVIII-specific B cell  
6 staining performed on splenic cell suspensions from (A) naïve IgHEL mice (n=3) that express only  
7 HEL-specific B cell receptor, (B) HemA mice without (n=3) and (C) Hem A mice injected with 2  
8 UI FVIII per mouse once per week (n=3) are shown.

9  
10

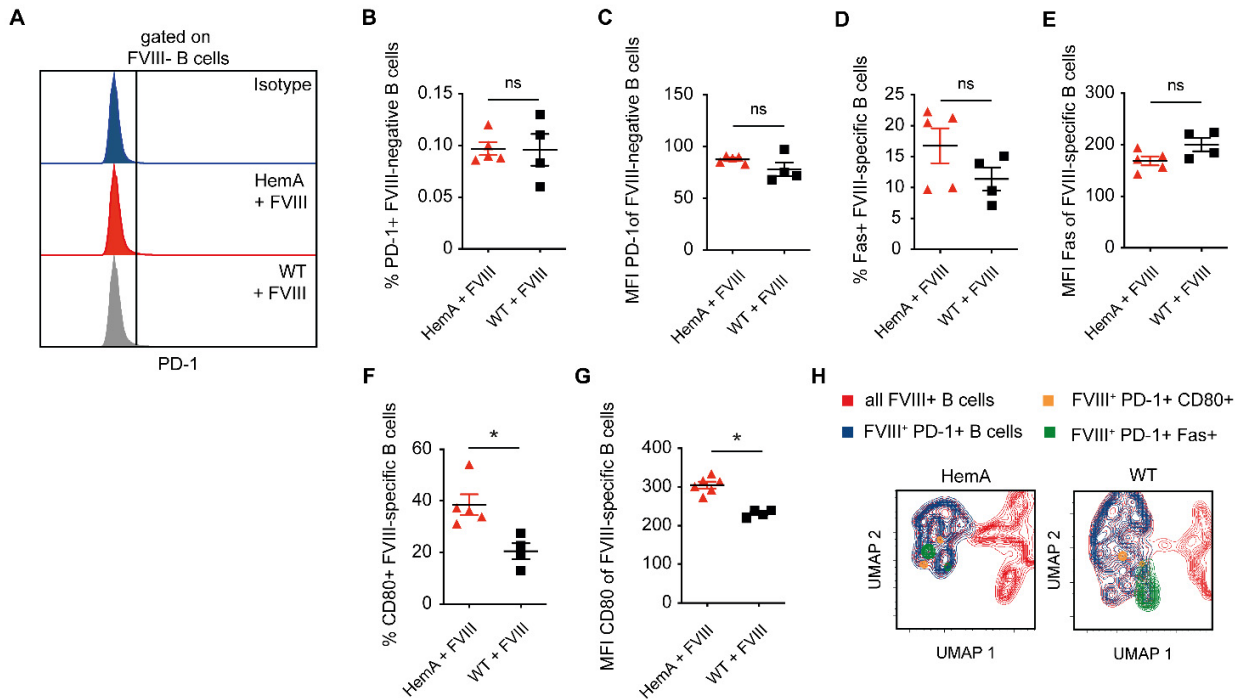

11

12 **Supplemental Figure 2. PD-1 controls anti-FVIII antibody responses in FVIII-competent mice.**

13 Experimental setup for A-H: Two UI/mouse of human rFVIII were intravenously injected into HemA  
 14 (red, n=5) and WT (black, n=4) in weekly intervals. One day after the last injection splenocytes were  
 15 further analyzed by flow cytometry. (A) Representative histograms of the PD-1 expression of FVIII-  
 16 negative B cells. (B) Quantification of the percentage of PD-1 expressing FVIII-negative B cells. (C)  
 17 Molecular PD-1 expression on FVIII-negative B cells determined by flow cytometry. (D) Percentage  
 18 of FVIII-specific B cells expressing Fas analyzed at day 22 *ex vivo*. (E) MFI of Fas expressing FVIII-  
 19 specific B cells. (F) Quantification of the percentage of CD80 expressing FVIII-specific B cells. (G)  
 20 Molecular CD80 expression on FVIII-specific B cells. (H) Representative UMAPS of FVIII-specific  
 21 B cells are shown to demonstrate PD-1 single expression or co-expression with CD80 or Fas. P values  
 22 were calculated using a Students T test. ns...not significant; \*P <0.05.

23

24

25

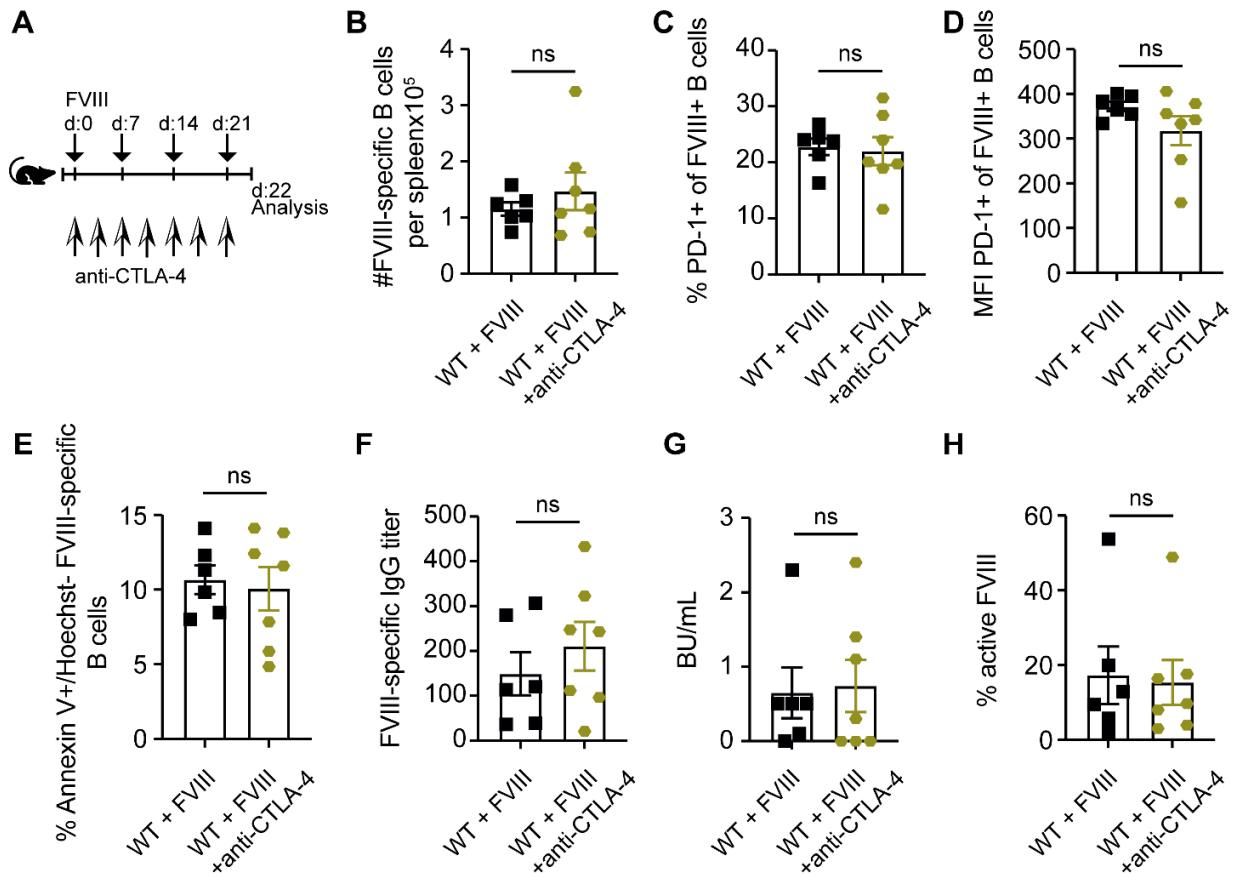

26

27 **Supplemental Figure 3. CTLA-4 does not regulate inhibitor formation against FVIII.** (A)  
 28 Experimental scheme for B-H: WT mice were injected once a week with 2UI of rFVIII (black, n=6).  
 29 One group of WT mice additionally received an anti-CTLA-4 inhibitory antibody that was applied  
 30 twice a week (green, n=7) intraperitoneally. (B) Quantification of the number of FVIII-specific B cells  
 31 in the spleen of WT mice after treatment with or without anti-CTLA-4 by flow cytometry. (C)  
 32 Percentage of PD-1 expressing FVIII-specific B cells and (D) MFI of PD-1 on FVIII-specific B cells  
 33 at day 22. (E) Quantification of the percentage of apoptotic FVIII-specific B cells by analyzing the  
 34 expression of Annexin V and Hoechst. (F, G) ELISA-based quantification of the FVIII-specific IgG  
 35 antibody titer (F) and Bethesda units per ml (G) in the serum as well as the percentage of residual  
 36 active FVIII (H) in the plasma with a COATEST assay in WT and WT mice treated with an anti-  
 37 CTLA-4 blocking antibody. P values were calculated using a Students T test. ns...not significant  
 38  $P > 0,05$ .

39

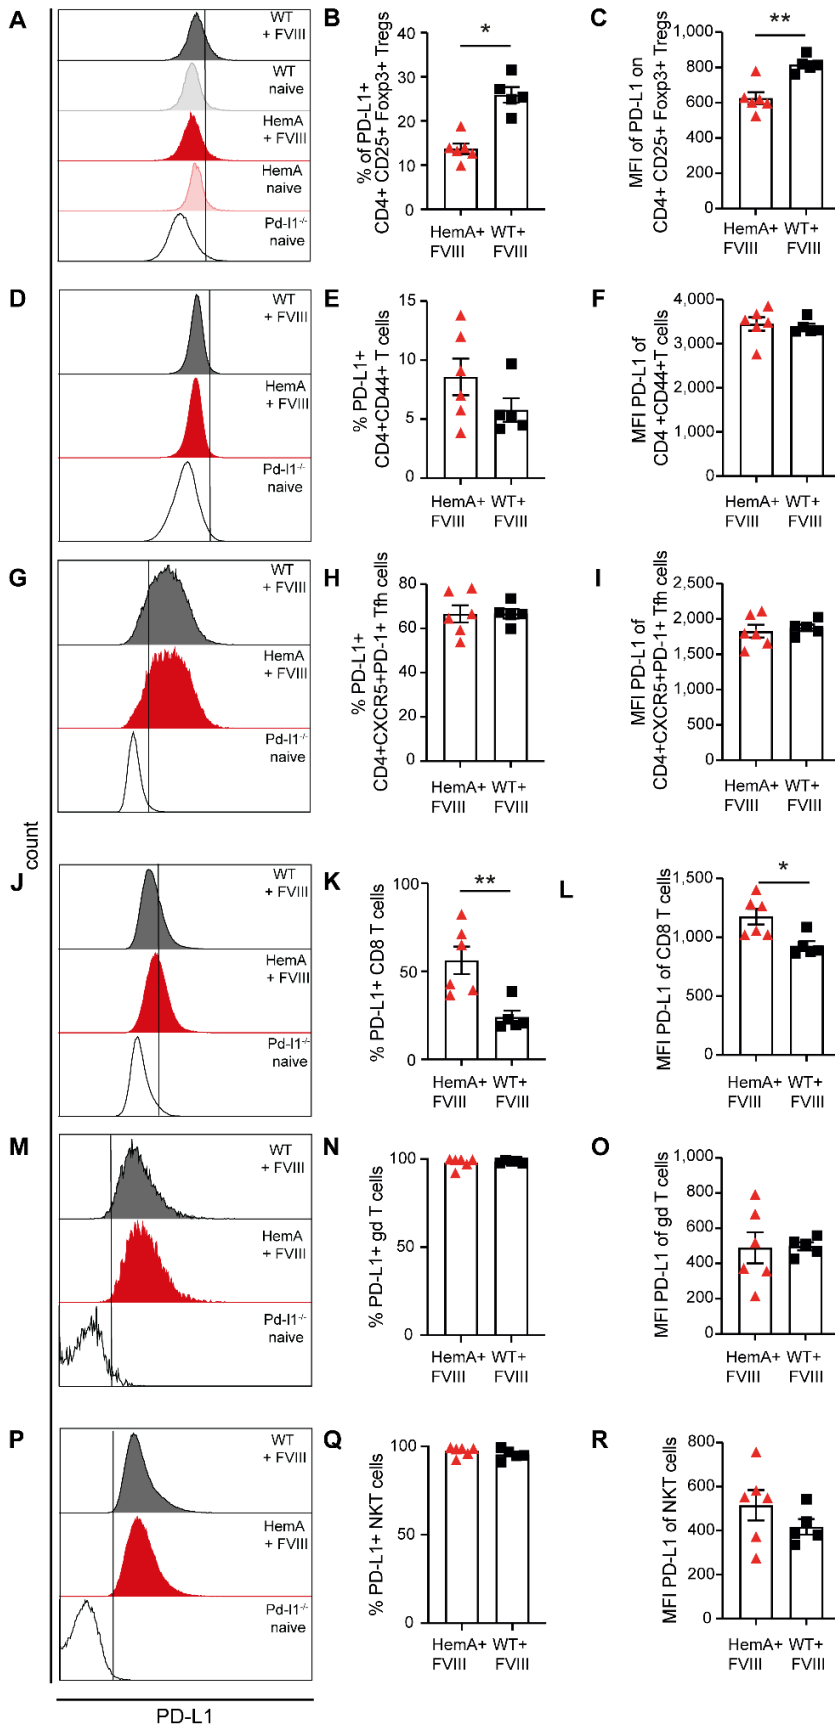

41 **Supplemental Figure 4. Enhanced PD-L1 expression on Tregs in WT mice.** (A-S) Two UI/mouse  
 42 of human rFVIII were intravenously injected into HemA (red, n=6) and WT (black, n=5) in weekly  
 43 intervals. One day after the last injection splenocytes were further analyzed by flow cytometry. Within  
 44 each histogram, HemA mice are displayed in red and WT mice in grey in comparison to the Pd-11  
 45 knockout control (black line). (A) Representative histograms of the PD-L1 expression on CD4<sup>+</sup>Foxp3<sup>+</sup>  
 46 T cells of immunized mice and naïve HemA mice (light red) or WT control (grey). (B) Percentage of  
 47 PD-L1 expression and (C) the amount of PD-L1 per cell on regulatory T cells gated as CD4<sup>+</sup>Foxp3<sup>+</sup>  
 48 T cells. (D) Representative histograms of the PD-L1 expression on activated CD4<sup>+</sup>CD44<sup>+</sup> T cells. (E)  
 49 Percentage of PD-L1 expression and (F) the amount of PD-L1 per cell on activated T cells gated as  
 50 CD4<sup>+</sup>CD44<sup>+</sup> T cells. (G) Representative histograms of the PD-L1 expression on follicular T helper  
 51 cells. (H) Percentage of PD-L1 expression and (I) the amount of PD-L1 per cell on follicular T helper  
 52 cells gated as CD4<sup>+</sup>CXCR5<sup>+</sup>PD-1<sup>+</sup> T cells. (J) Representative histograms of the PD-L1 expression on  
 53 CD8 T cells. (K) Percentage of PD-L1 expression and (L) the amount of PD-L1 per cell on CD8 T  
 54 cells gated as CD8<sup>+</sup> T cells. (M) Representative histograms of the PD-L1 expression on gd T cells.  
 55 (N) Percentage of PD-L1 expression and (O) the amount of PD-L1 per cell on gd T cells gated as  
 56 CD45<sup>+</sup>CD3e<sup>+</sup>gdTCR<sup>+</sup> T cells. (P) Representative histograms of the PD-L1 expression on NKT cells.  
 57 (Q) Percentage of PD-L1 expression and (R) the amount of PD-L1 per cell on NKT cells gated as  
 58 CD45<sup>+</sup>CD3e<sup>+</sup>NK1.1<sup>+</sup> T cells. P values were calculated using a Students T test. \*P < 0.05; \*\*P < 0.01.  
 59

60

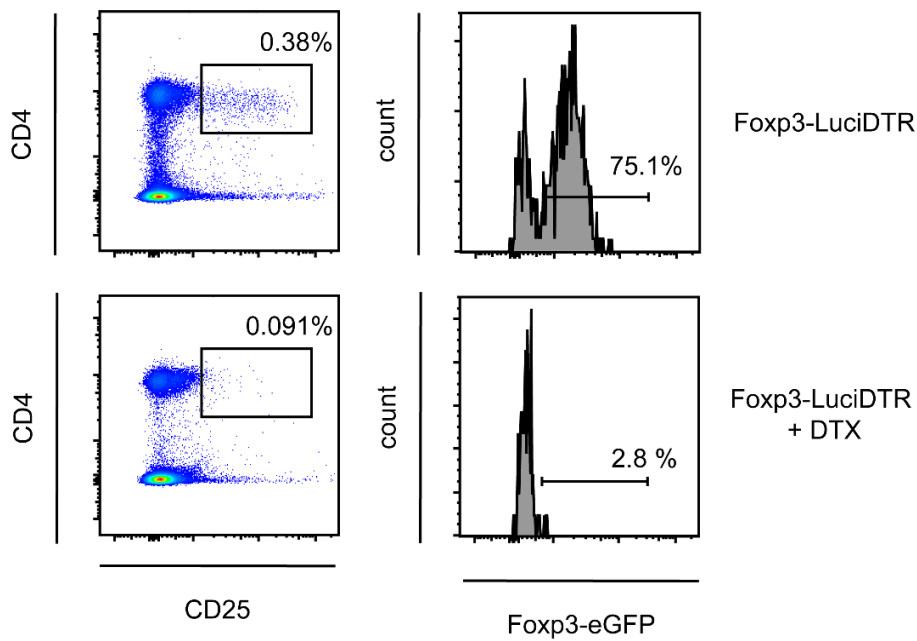

61

62 **Supplemental Figure 5. Treg depletion efficiency.** In Foxp3-LuciDTR mice Foxp3<sup>+</sup> (n=5) Tregs  
 63 were depleted by injecting 15 ng/g mouse DTX intraperitoneally at day -1 and 0 of the experiment.  
 64 Depletion efficiency was controlled in blood samples of DTX treated and untreated mice (n=3) by  
 65 flow cytometry. Representative Dot blots and histograms are shown. Up to 97% of all eGFP (Foxp3)<sup>+</sup>  
 66 Tregs were depleted.

67

68

69

70

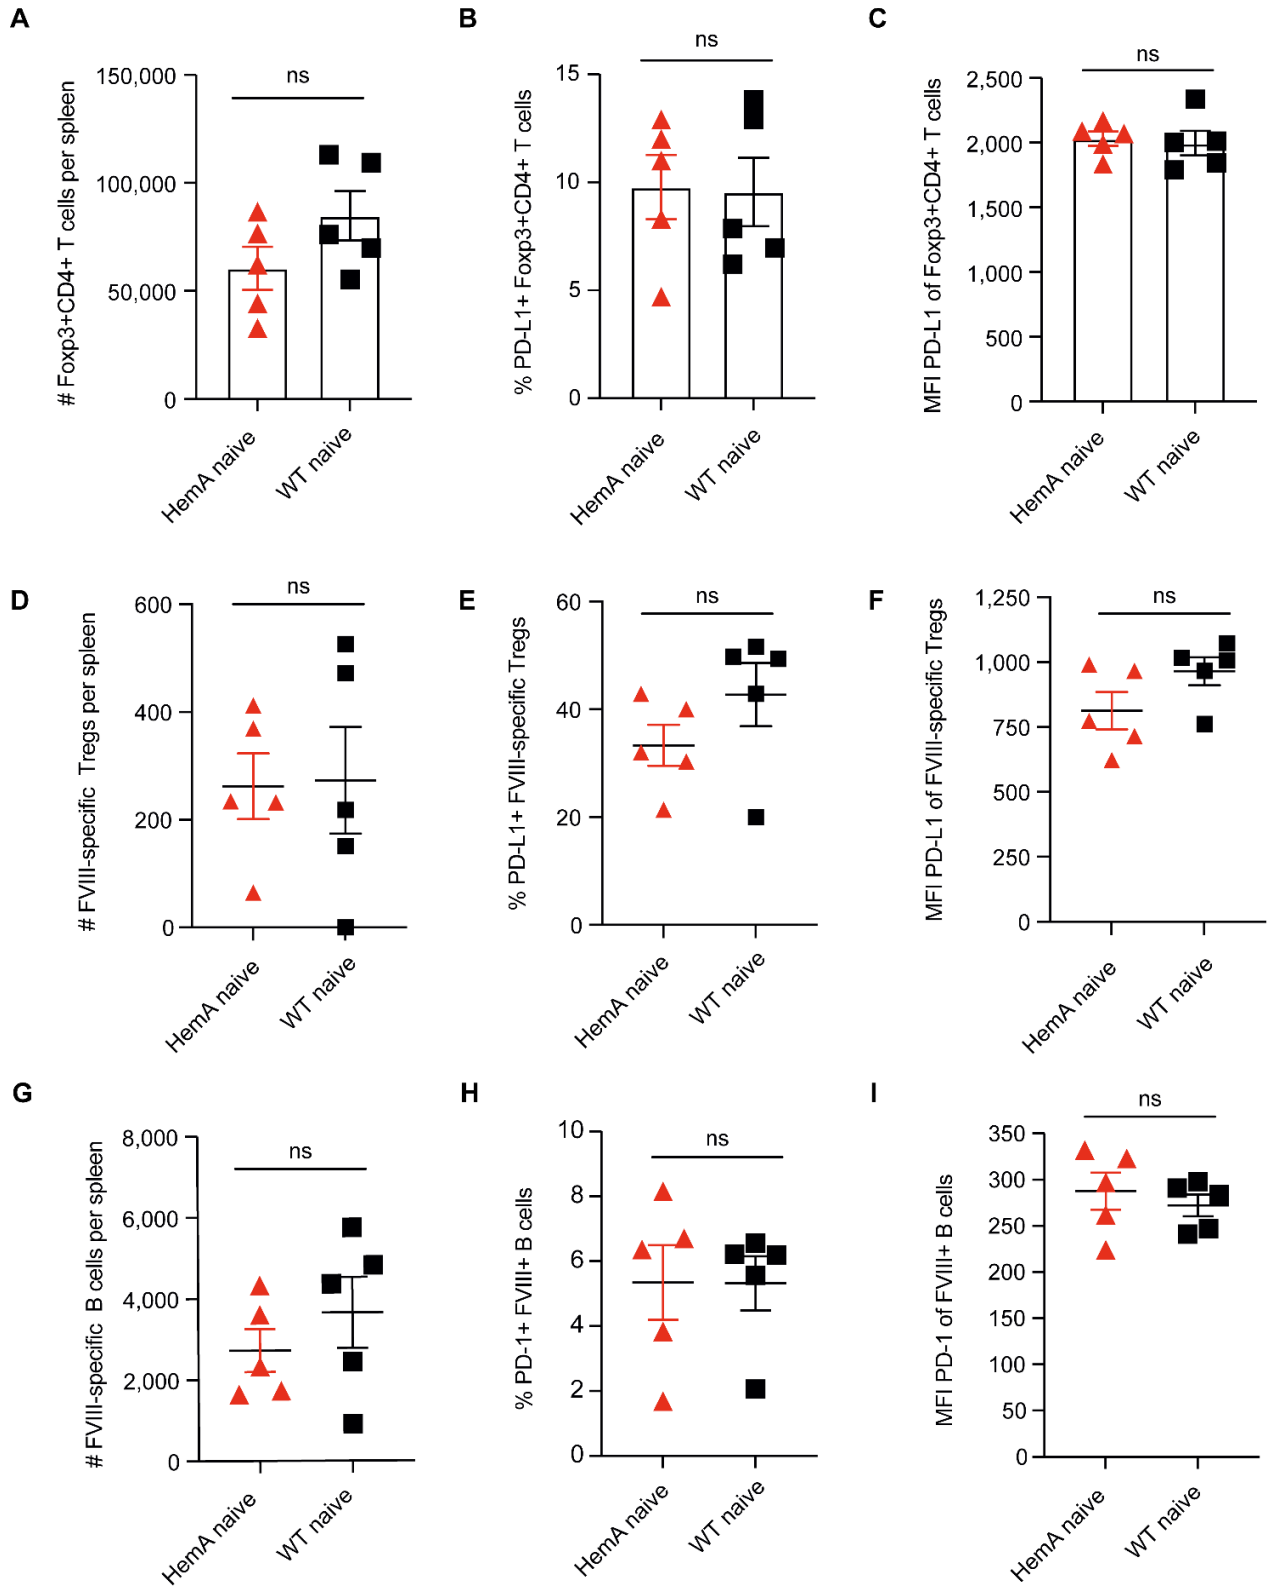

71

72

73 **Supplemental Figure 6. No differential PD-L1 or PD-1 expression in naïve HemA and WT mice.**  
74 Splenocytes of naïve HemA (n=5) and WT mice (n=5) were analyzed by flow cytometry. (A)  
75 Determination of the number of Tregs gated as CD4<sup>+</sup>Foxp3<sup>+</sup>, as well as their percentage (B) and their  
76 molecular expression of PD-L1 per cell (C). (D) Number of FVIII-specific Tregs gated as single living  
77 B220<sup>-</sup> CD4<sup>+</sup> CD25<sup>+</sup> CD127<sup>-</sup> T cells. (E) Determination of the proportion of PD-L1<sup>+</sup> FVIII-specific  
78 Tregs. (F) PD-L1 expression per cell quantified as gMFI on FVIII-specific Tregs. (G) number of  
79 FVIII-specific B cells analyzed by flow cytometry. (H) PD-1 expression shown as % and (I) MFI of  
80 PD-1 on FVIII-specific B cells. P values were calculated using a Students T test. ns...not significant  
81 P >0.05.  
82



83

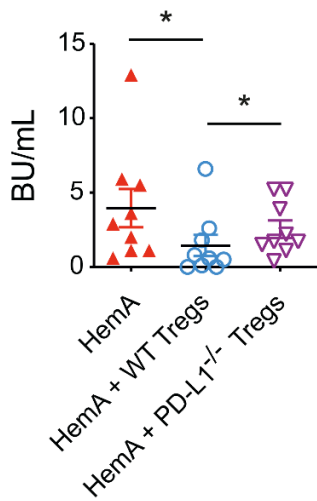

84

85 **Supplemental Figure 7. PD-L1 competent Tregs reduce inhibitor titers in HemA mice.** Tregs  
 86 were isolated either from WT or PD-L1<sup>-/-</sup> mice and 1x10<sup>6</sup> cells were transferred into HemA mice by  
 87 intravenous injections. Starting from the next day, HemA (red, n=9) and HemA mice that received  
 88 Tregs from WT (blue, n=9) or PD-L1<sup>-/-</sup> (purple, n=9) mice were intravenously injected with 2  
 89 UI/mouse of rFVIII in weekly intervals. One day after the last injection blood serum was harvested.  
 90 Bethesda units per ml were measured by ELISA in serum of the indicated mice. P values were  
 91 calculated using one-way ANOVA and Bonferroni posttest. \*P < 0.05.

92

93

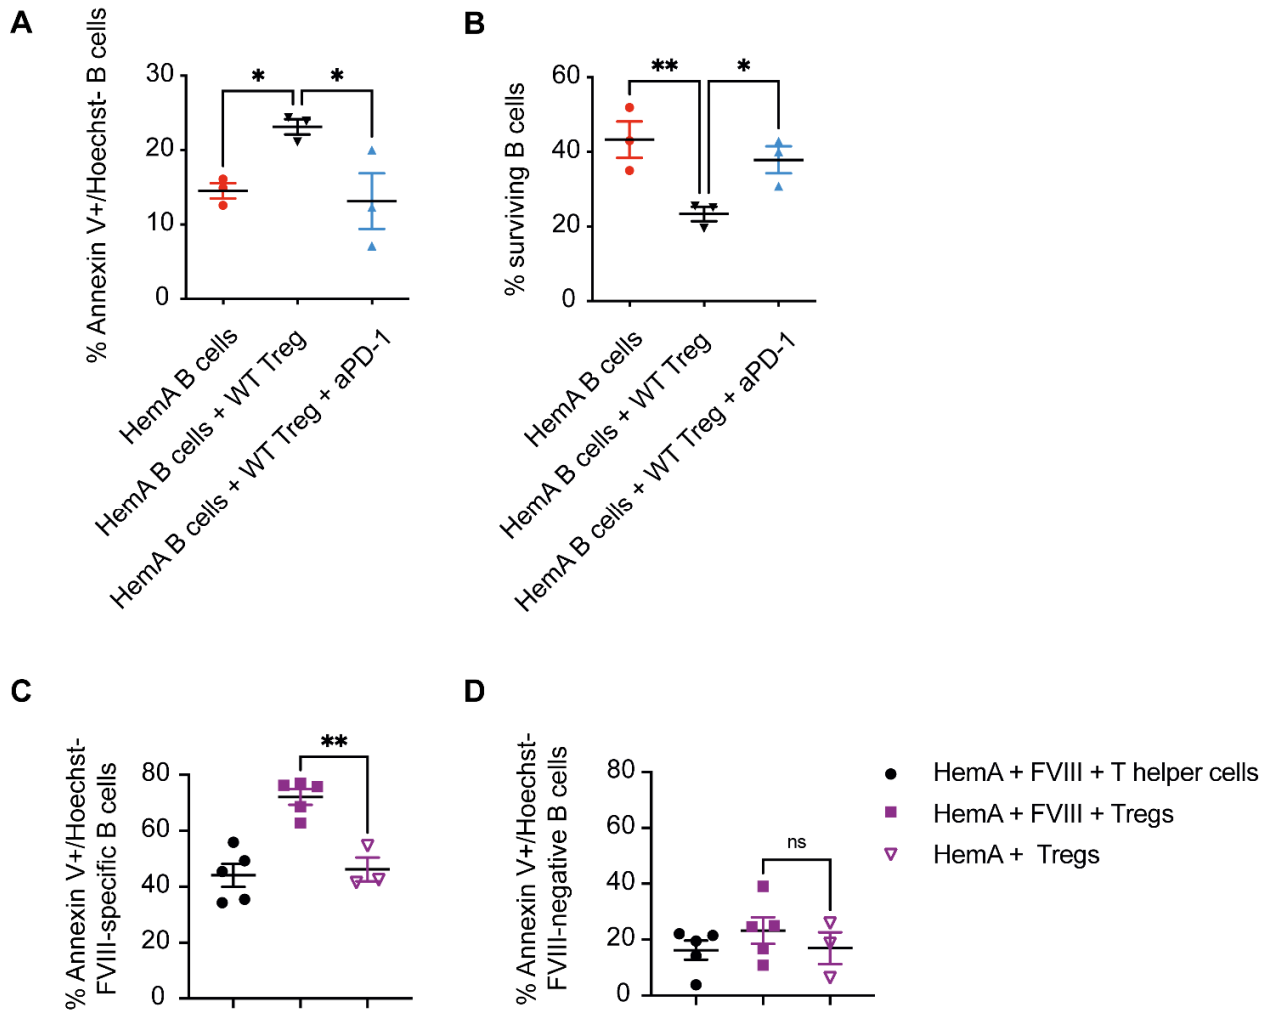

94  
 95 **Supplemental Figure 8. Treg-mediated suppression of antibody-producing B cells is PD-1**  
 96 **dependent.** Hema mice (n=3) were immunized 3 times with 2UI of FVIII in a weekly interval.  
 97 Afterwards, plasma cells were isolated from splenic cell suspensions and  $3 \times 10^5$  B cells were  
 98 cocultured with  $5 \times 10^5$  Tregs isolated from naïve WT mice for 16 hours with or without a PD-1  
 99 blocking antibody (RPM1-14; 40  $\mu$ g/ml). (A) Percentage of early apoptotic B cells after co-culture.  
 100 (B) overall percentage of surviving B cells after 16 hours of co-culture. (C and D)  $0.5 \times 10^6$  naïve  
 101 splenocytes from Hema mice (n=5) were co-cultured with either  $0.5 \times 10^6$  wildtype Tregs or T helper  
 102 cells for 16 hours with or without FVIII protein. Quantification of the proportion of early apoptotic  
 103 FVIII-specific B cells (C) or FVIII-unspecific B cells (D). P values were calculated using one-way  
 104 ANOVA and Bonferroni posttest. ns...not significant  $P > 0.05$ , \* $P < 0.05$ , \*\* $P < 0.001$ .

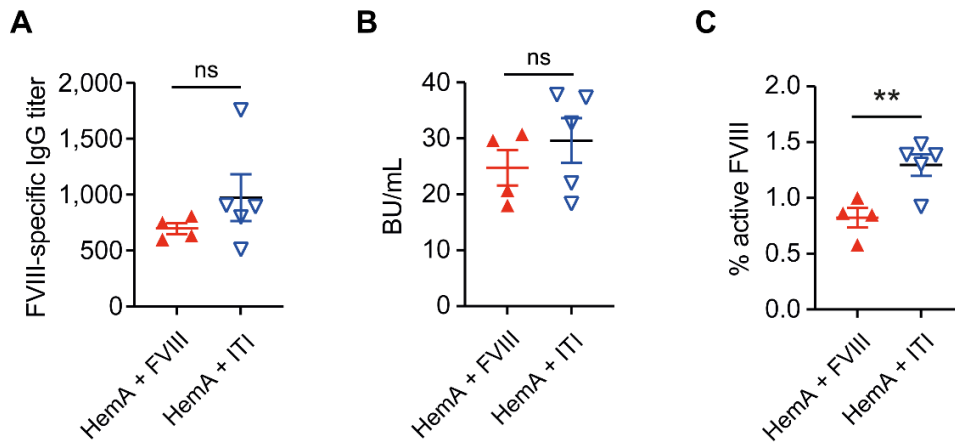

105  
 106 **Supplemental Figure 9. ITI-like treatment increases active FVIII levels but does not diminish**  
 107 **inhibitors in Hema mice.** Experimental setup for A-C: 2 UI/mouse of human rFVIII were  
 108 intravenously injected into Hema (red, n=4) mice in weekly intervals for three weeks, and twice a  
 109 week for the high dose FVIII regime (blue, n=5). Compared to the therapeutic FVIII treatment (once  
 110 a week), the high dose FVIII application regime (twice a week) is used to induce tolerance (short ITI)  
 111 in Hema mice. One day after the last injection blood serum and plasma were harvested and further  
 112 analyzed by ELISA or COATEST assay, respectively. (A) Quantification of the FVIII-specific IgG  
 113 antibody titer and (B) Bethesda units per ml in the serum. (C) The percentage of residual active FVIII  
 114 was determined in the plasma of Hema mice treated with FVIII once or twice a week. P values were  
 115 calculated using a Students T test. ns...not significant; \*\*P < 0.01.

116  
 117  
 118

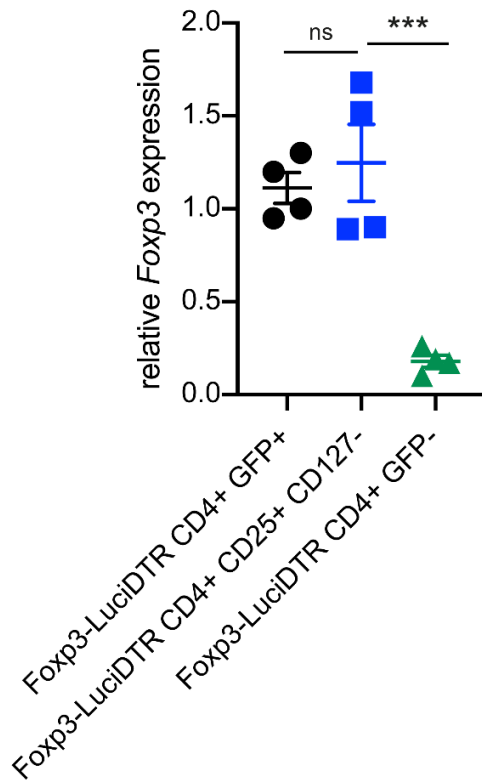

119  
 120 **Supplemental Figure 10. Foxp3 expression of sorted CD25<sup>+</sup>CD127<sup>-</sup> CD4<sup>+</sup> T cells.** Regulatory T  
 121 cells of Foxp3-Luciferase DTR mice (n=4) were sorted either as CD4<sup>+</sup>eGFP<sup>+</sup>(Foxp3<sup>+</sup>) or as  
 122 CD4<sup>+</sup>CD25<sup>+</sup>CD127<sup>-</sup> T cells. As a control CD4 T helper cells were sorted as CD4<sup>+</sup> eGFP<sup>-</sup>(Foxp3<sup>-</sup>) T  
 123 cells. RNA isolation and a subsequent qRT-PCR was performed to determine the expression of *Foxp3*  
 124 in these cells. Expression is correlated to one mean of Tregs sorted as CD4<sup>+</sup>eGFP<sup>+</sup> T cells. P values  
 125 were calculated using one-way ANOVA and Bonferroni posttest. ns...not significant P>0,05; \*\*\*P <  
 126 0.001.

127

128

129

130

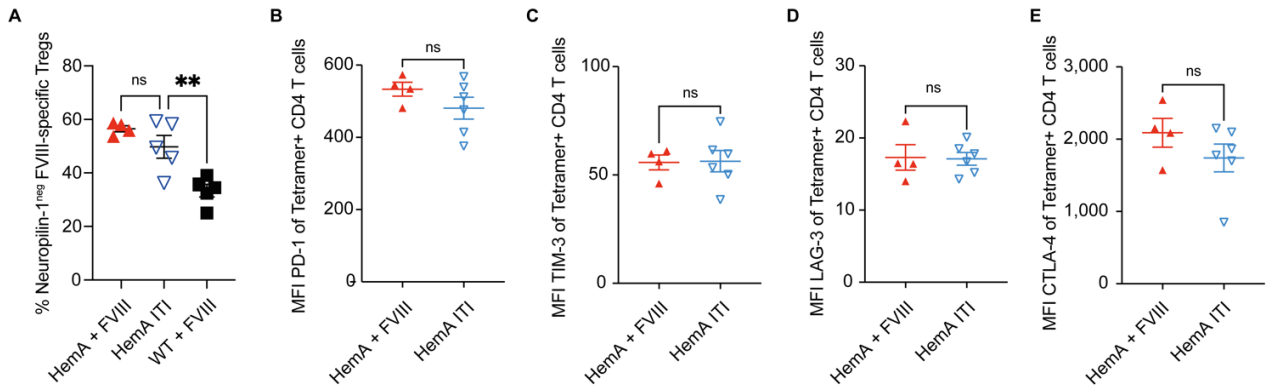

131

132 **Supplemental Figure 11. ITI-induced Tregs are mainly peripherally derived Tregs.** (A) 2

133 UI/mouse of human rFVIII were intravenously injected into HemaA mice (red, n=4) or WT mice  
 134 (black, n=5) in weekly intervals for 3 weeks, and twice a week for the high dose FVIII regime (blue,  
 135 n=5). At day 22, splenic suspensions were analyzed by flow cytometry to discriminate the proportion  
 136 of peripherally-derived (Neuropilin-1 negative) FVIII-specific Tregs. FVIII-specific Tregs were  
 137 identified as living, single B220-CD4+CD25+CD127- T cells. Error bars represent SEM. P values  
 138 were calculated using one-way ANOVA and Bonferroni posttest. ns...not significant, \*\*P < 0,001.

139 (B-E) 2 UI/mouse of human rFVIII were intravenously injected into HemaA mice (red, n=4) in weekly  
 140 intervals for 3 weeks, and twice a week for the high dose FVIII regime (blue, n=6). At day 22, splenic  
 141 suspensions were analyzed by flow cytometry to determine the expression of the exhaustion markers  
 142 PD-1 (B), TIM-3 (C), LAG-3 (D) and CTLA-4 (E), per cell on living, single FVIII-specific  
 143 (tetramer+) CD4 T cells. P values were calculated using a Students T test. ns...not significant P>0,05.

144

145

146

147

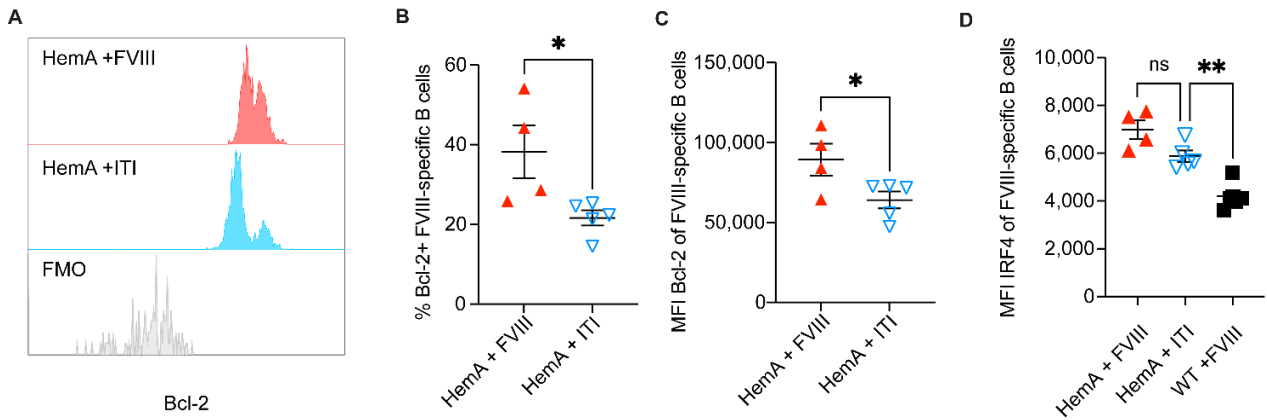

148

149

150 **Supplemental Figure 12. Decreased Bcl-2 expression in FVIII-specific B cells of ITI-treated**  
 151 **mice.** (A-C) Two UI/mouse of rFVIII were intravenously injected into HemA (red, n=4) mice in  
 152 weekly intervals. Immune tolerance induction in HemA mice (blue n=5) was achieved by injecting  
 153 of rFVIII twice a week. (A) Representative histograms of Bcl-2 expression in FVIII-specific B cells.  
 154 (B) Quantification of the proportion of Bcl-2 expressing FVIII-positive B cells. (C) Mean Bcl-2  
 155 expression per cell in FVIII-positive B cells. P values were calculated using a Students T test. \*P <  
 156 0.05 (D) Two UI/mouse of rFVIII were intravenously injected into HemA (red, n=4) or WT (black,  
 157 n=5) mice in weekly intervals. Tolerized HemA mice (blue n=5) were injected twice a week with  
 158 rFVIII. Mean expression of IRF4 per cell in FVIII-positive B cells is displayed. P values were  
 159 calculated using one-way ANOVA and Bonferroni posttest. \*\*P < 0,001

160

161

162

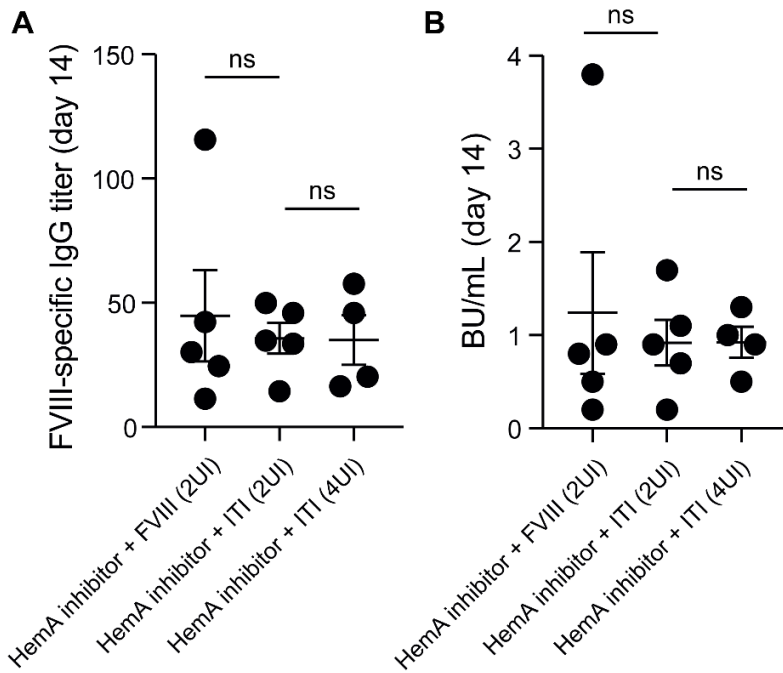

163

164 **Supplemental Figure 13. Inhibitor formation in HemA mice.** Two UI/mouse of human rFVIII were  
 165 intravenously injected into HemA mice (n=14) in weekly intervals. HemA mice were bled 14 days  
 166 after initial injection to measure IgG antibodies (A) and inhibitor production (B) in the serum of the  
 167 mice via ELISA. Based on these results the mice were equally distributed amongst all three group to  
 168 obtain a comparable pre-treatment titer as depicted in A and B. P values were calculated using one-  
 169 way ANOVA and Bonferroni posttest. ns...not significant P>0,05.

170

171

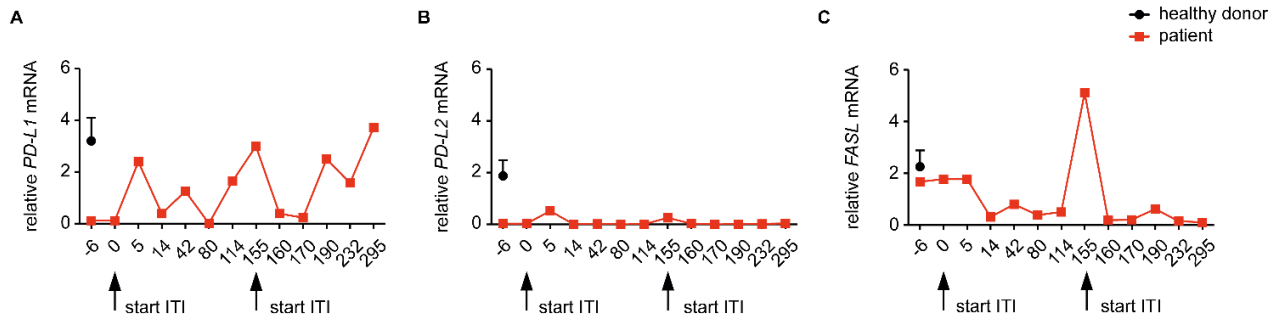

172

173 **Supplemental Figure 14. Inhibitory ligand expression on FVIII-specific B cells in humans.** (A-

174 C) mRNA was extracted from sorted FVIII-specific B cells of the patient on ITI shown in Figure 6B

175 (red) or healthy controls (black) and analyzed by RT-PCR at different time points during ITI. Relative

176 mRNA expression of *PD-L1* (A), *PD-L2* (B), and *FASL* (C) in FVIII-specific B cells. Expression is

177 correlated to one healthy individual. Data are presented as mean +/- SEM.

178

179



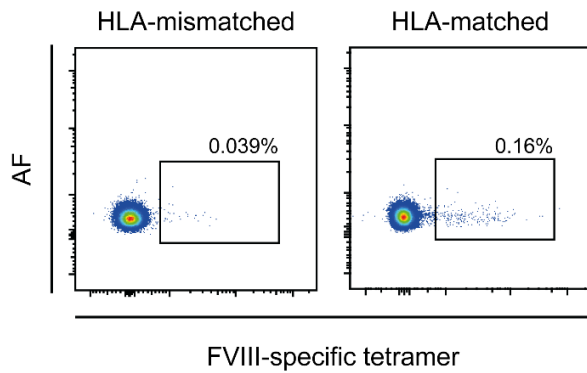

180  
181 **Supplemental Figure 15. FVIII-specific tetramer staining of CD4 T cells in humans.** Blood was  
182 collected from HLA-matched (HLA15.01, n=3) or -mismatched hemophilia A patients (n=3). The  
183 specificity of the tetramer staining was verified by flow cytometry. The cells were gated on living  
184 single cells and the binding capacity is displayed on CD4<sup>+</sup> T cells. Representative dot plots are shown.  
185  
186
